# Supplementary material
Source: PubMed Central journal article supplement (PMC3383354)

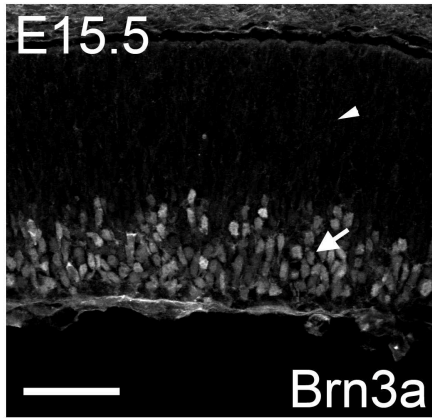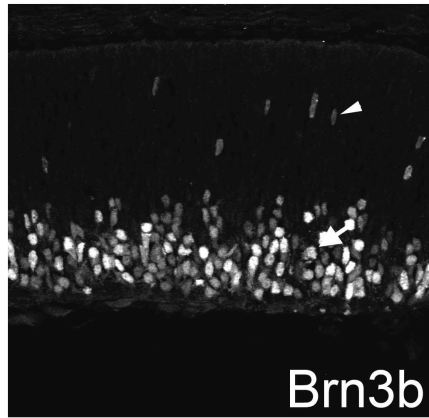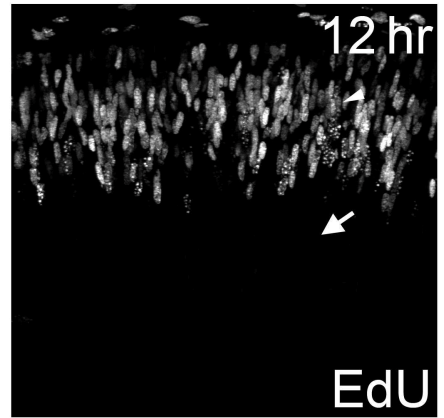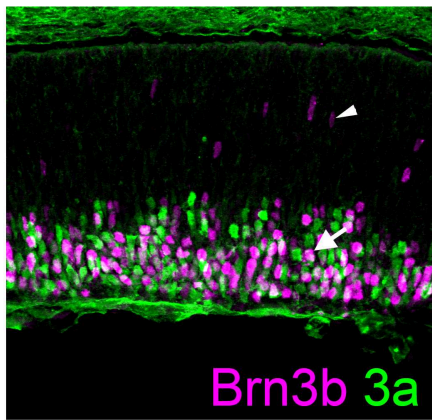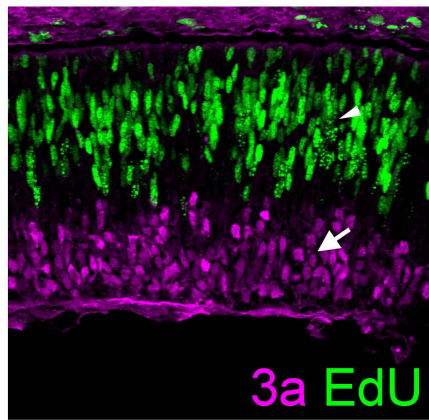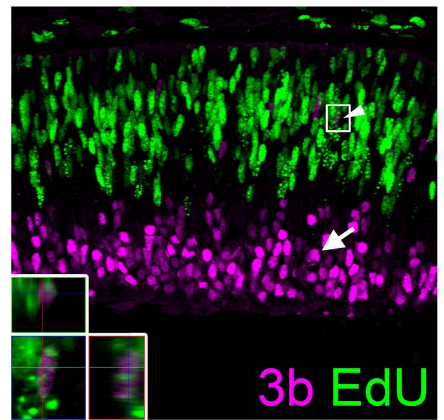

Supplement: NIHMS376425-supplement-01.pdf [file NIHMS376425-supplement-01.pdf]
